# Supplementary material for: Ionization matrix effects in plasma-based ambient mass spectrometry sources
Source: Royal Society of Chemistry journal article supplement (doi:10.1039/b923564g), 2010-01-01
Supplement: b923564g.pdf [file b923564g.pdf]

## Supplemental Information

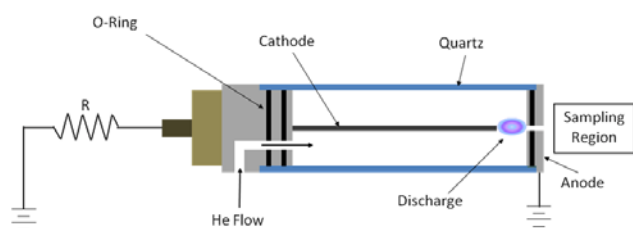

**Figure S-1.** Diagram of the FAPA source used in this study.

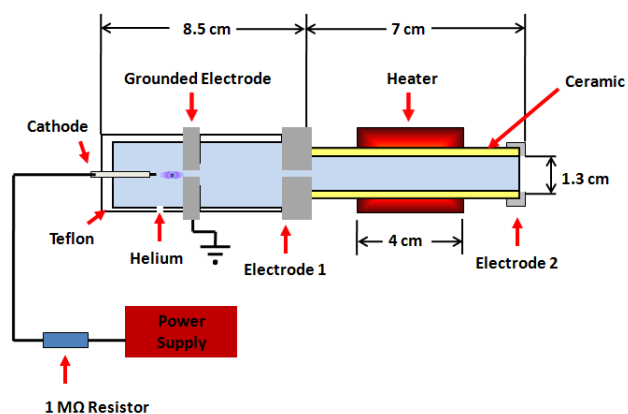

**Figure S-2.** Diagram of the home-built DART source used in this study.

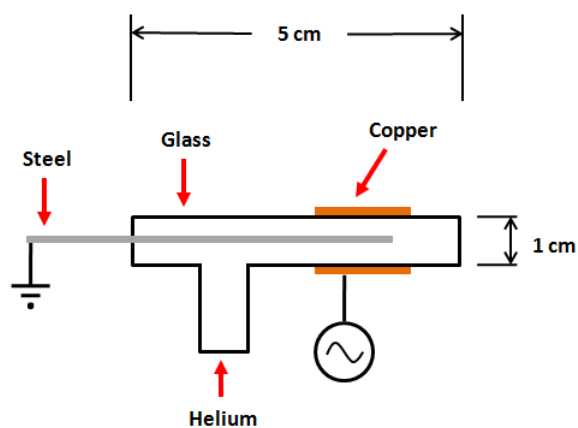

**Figure S-3.** Diagram of the home-built LTP source used in this study.
